# Supplementary material
Source: Springer Nature journal article supplement (https://www.springermedizin.de/resource/supplementary/12879_2012_2263_MOESM3_ESM.pdf/9443794)

**(A)** Without PMA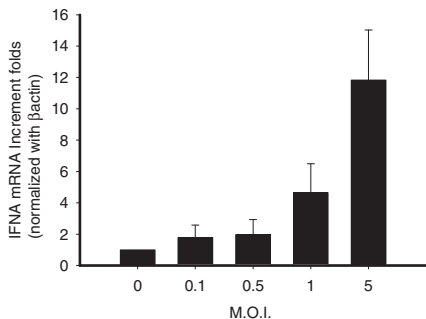**(B)** Without PMA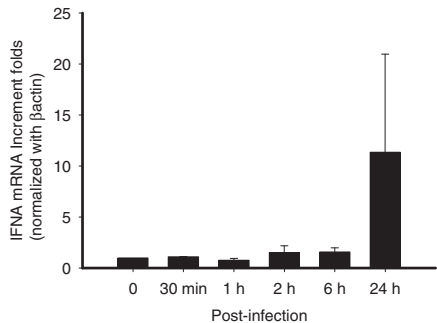**(C)** With PMA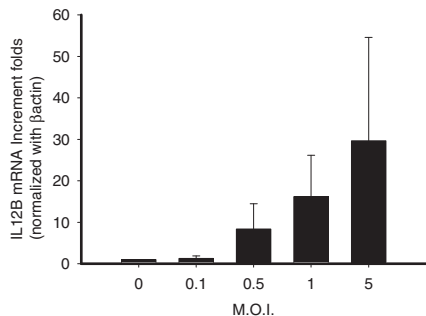**(D)** With PMA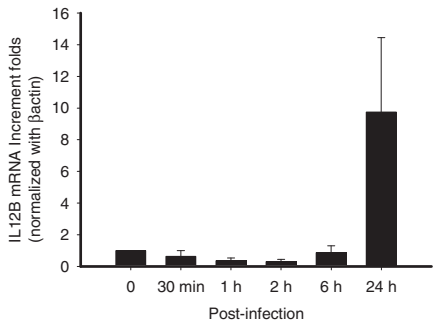**(E)** With PMA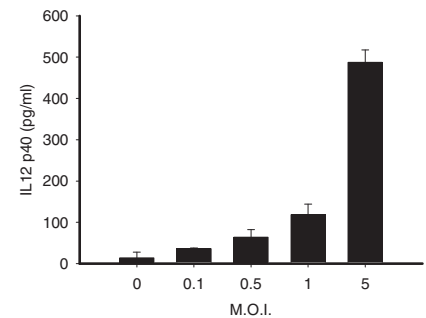**(F)** With PMA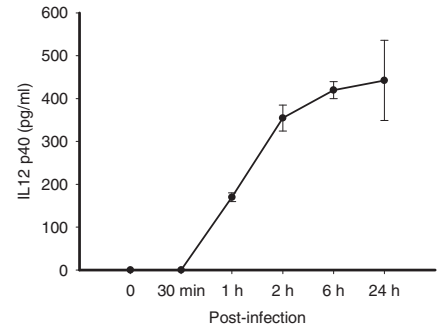

Supplement: MOESM3 [file 9443794]
